# Supplementary material
Source: publisher figshare collection journal article supplement (https://frontiersin.figshare.com/ndownloader/files/14250674)
Supplement: Supplementary file [file 14250674]

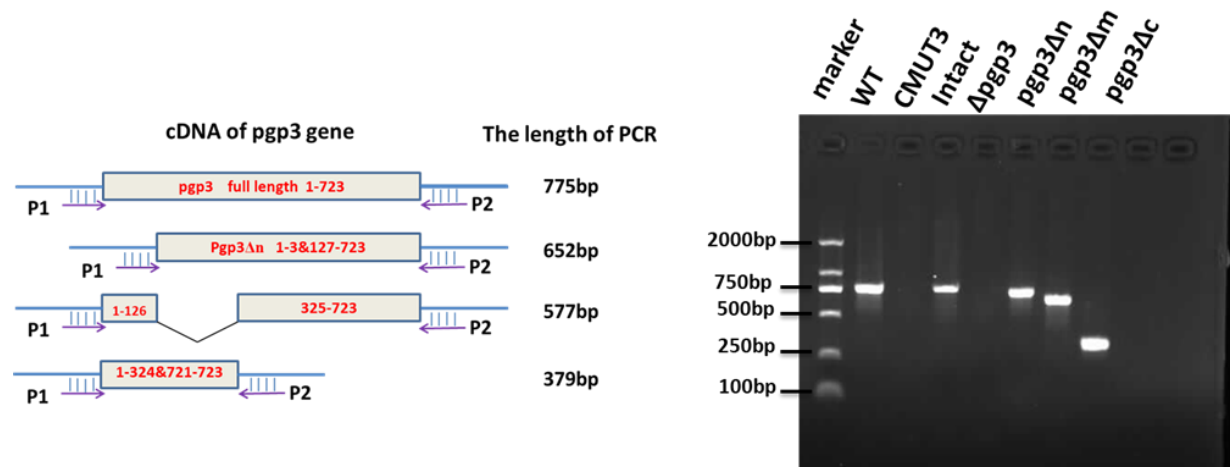

Fig. S2. The transcription levels of different Pgp3 mutants in various transformants were assessed by RT-PCR. HeLa cells infected with the chlamydial organisms as listed on top of the right panel were harvested at 20 h postinfection for RT-PCR detection of transcripts of the Pgp3 protein. The left panel showed the different lengths of PCR productions generated from various *C. muridarum* organisms' cDNA by one pair of primers designed from both sides of pgp3 gene. The result indicates that the mutated Pgp3 could express, at least, in the transcriptional level.
